# Supplementary material
Source: publisher site journal article supplement (https://www.dovepress.com/get_supplementary_file.php?f=257661-supplementary-file-2.xlsx)
Supplement: Supplementary file 1 [file get_supplementary_file.php]

## Sheet: Sheet1
ID	Resistant/Intolerant to	Group	Phase of Disease	Gender	Age	Number of mutations	ABL1	KMT2C	FAT1	ASXL1	SETBP1	GATA2	TET2	RUNX1	DNMT3A	AMER1	BCL2	MLH1	KIT	EP300	CUX1	KMT2A	NOTCH1	MTHFR	EGFR	SETD2	TPMT	BRAF	EZH2	CYP2C19	SH2B3	U2AF1	IL7R	XRCC1	CYP3A4	APC	CREBBP	HAX1	PDGFRA	WT1	BCORL1	NF1	PHF6	BLM	CSF3R	GNAS	MEF2B	SMC3	ATM
B1	Imatinib	TKIs-resistance	CP	Female	61	1																								c.636G>A(p.W212X) 48.92% ID=COSM147000;OCCURENCE=1(stomach)
B10	Imatinib	TKIs-resistance	CP	Male	42	0
B10	Imatinib	TKIs-resistance	CP	Male	42	0
B11	Imatinib	TKIs-resistance	CP	Female	36	1			c.7106C>T(p.T2369M) 48.38%;
B12	Imatinib	TKIs-resistance	CP	Female	39	3	c.944C>T(p.T315I) 5.01% ID=COSM12610,COSM1460517;OCCURENCE=4(haematopoietic_and_lymphoid_tissue),1(large_intestine);c.763G>A(p.E255K) 1.28% ID=COSM12573;OCCURENCE=22(haematopoietic_and_lymphoid_tissue);c.758A>T(p.Y253F) 1.60% ID=COSM12560;OCCURENCE=56(haematopoietic_and_lymphoid_tissue)	c.2189C>A(p.S730Y) 4.83%			c.1828G>A(p.V610I) 50.27%															c.6869A>T(p.Q2290L) 48.68%
B13	Dasatinib	TKIs-resistance	CP	Male	40	1	c.730A>G(p.M244V) 10.10% ID=COSM12608;OCCURENCE=4(haematopoietic_and_lymphoid_tissue)																									c.692C>T(p.S231L) 3.18% ID=COSM1130534,COSM1288794;OCCURENCE=1(autonomic_ganglia),2(prostate)
B14	Dasatinib	TKIs-resistance	CP	Male	48	3							c.3116C>T(p.S1039L) 50.91%			c.228A>G(p.G76G) 1.40% ID=COSM1472322,COSM1472323;OCCURENCE=1(prostate)
B15	Nilotinib	TKIs-resistance	CP	Male	35	2			c.1744C>G(p.L582V) 49.70%				c.5162T>G(p.L1721W) 50.84%
B16	Dasatinib	TKIs-resistance	CP	Female	43	5	c.1052T>C(p.M351T) exon6 45.88% ID=COSM12578;OCCURENCE=19(haematopoietic_and_lymphoid_tissue)			c.1888_1910del(p.H630fs) exon12 7.71% ID=COSM51200;OCCURENCE=6(haematopoietic_and_lymphoid_tissue)					c.2206C>G(p.R736G) exon19 45.14%	c.85G>A(p.A29T) 50.10% ID=COSM28715;OCCURENCE=3(kidney)													c.1544A>G(p.K515R) 1.00%		c.1606G>A(p.A536T) 49.69%
B16	Dasatinib	TKIs-resistance	CP	Female	43	5	c.1052T>C(p.M351T) Exon 6 12.49% ID=COSM12578;OCCURENCE=19(haematopoietic_and_lymphoid_tissue)			c.1888_1910del(p.H630fs) Exon 12 9.42% ID=COSM51200;OCCURENCE=6(haematopoietic_and_lymphoid_tissue)	c.2608G>A(p.G870S) Exon 4 3.73% ID=COSM1234973;OCCURENCE=29(haematopoietic_and_lymphoid_tissue)				c.2206C>G(p.R736G) Exon 19 13.65%	c.85G>A(p.A29T) Exon 2 49.39% ID=COSM28715;OCCURENCE=3(kidney)															c.1606G>A(p.A536T) Exon 8 47.70%
B17	Dasatinib	TKIs-resistance	CP	Female	51	5		c.2294A>G(p.E765G) 5.74% ID=COSM227525,COSM227526;OCCURENCE=1(skin)							c.1138G>A(p.A380T) 7.00% ID=COSM1204298,COSM1204299;OCCURENCE=1(large_intestine)							c.6244G>A(p.V2082I) 49.56% ID=COSM268500;OCCURENCE=1(large_intestine)			c.2457G>A(p.V819V) 84.27% ID=COSM13400;OCCURENCE=1(liver),1(lung),1(central_nervous_system)
B18	Nilotinib	TKIs-resistance	CP	Male	49	2						c.490G>A(p.A164T) 99.91% ID=COSM445531;OCCURENCE=1(breast),1(large_intestine)																	c.553G>C(p.D185H) 100.00%
B19	Unknown	TKIs-resistance	BP	Male	47	3		c.2418C>G(p.S806S) 34.57% ID=COSM86082,COSM1496553;OCCURENCE=1(breast),1(kidney);c.2459C>T(p.T820I) 2.71%	c.2672A>C(p.H891P) 50.82%													c.218G>A(p.G73E) 50.69%
B20	Dasatinib	TKIs-resistance	CP	Female	45	3		c.11374C>A(p.Q3792K) 50.24% ID=COSM1581231,COSM1581232;OCCURENCE=1(haematopoietic_and_lymphoid_tissue)	c.3874G>A(p.E1292K) 49.18%
B21	Dasatinib	TKIs-resistance	CP	Male	40	5	c.730A>G(p.M244V) 23.07%ID=COSM12608;OCCURENCE=4(haematopoietic_and_lymphoid_tissue)		c.4358G>A(p.R1453H) 48.43%	c.1888_1910del(p.H630fs) 18.19% ID=COSM51200;OCCURENCE=6(haematopoietic_and_lymphoid_tissue)																		c.64G>A(p.D22N) 42.63%																		c.2530C>T(p.R844C) 24.66%ID=COSM123397,COSM27887;OCCURENCE=14(ovary),1(breast),8(bone),6(stomach),1(haematopoietic_and_lymphoid_tssue),2(soft_tissue),3(kidney),54(pancreas),5(parathyroid),4(liver),1(autonomic_ganglia),8(adrenal_gland),137(pituitary),2(lung),7(cervix),8(thyroid),1(upper_aerodigestive_tract),2(testis),29(large_intestine),3(biliary_tract),5(small_intestine)		c.1142G>C(p.R381P) 25.75%
B22	Imatinib	TKIs-resistance	CP	Female	34	2			c.3337G>A(p.D1113N) 49.51%;c.7130C>T(p.T2377M) 50.78%	c.2278C>T(p.Q760X) 1.95% ID=COSM97035;OCCURENCE=2(haematopoietic_and_lymphoid_tissue)
B23	Dasatinib	TKIs-resistance	CP	Male	31	1																																		c.797delC(p.P266fs) 1.00% ID=COSM28969;OCCURENCE=1(haematopoietic_and_lymphoid_tissue)
B24	Imatinib	TKIs-resistance	CP	Female	34	2			c.13652C>G(p.A4551G) 51.05%									c.1742C>T(p.P581L) 50.43%
B25	Nilotinib	TKIs-resistance	BP	Male	64	3	c.944C>T(p.T315I) 5.70% ID=COSM12560;OCCURENCE=56(haematopoieticand_lymphoid_tissue)		c.5413G>A(p.A1805T) 21.29%								c.515A>G(p.N172S) 48.78% ID=COSM220854,COSM220855;OCCURENCE=1(haematopoietic_and_lymphoid_tissue)																									c.1933A>G(p.M645V) 49.14% ID=COSM1581302,COSM1581303;OCCURENCE=4(haematopoietic_and_lymphoid_tissue)
B26	Imatinib	TKIs-resistance	BP	Male	48	3		c.2206T>C(p.L736L) Exon 14 5.56%；c.2294A>G(p.E765G) Exon 14 9.60% ID=COSM227525,COSM227526;OCCURENCE=1(skin)		c.2077C>T(p.R693X) 2.95% ID=COSM51388;OCCURENCE=11(haematopoietic_and_lymphoid_tissue),2(large_intestine)
B28	Dasatinib	TKIs-resistance	BP	Male	36	5	c.944C>T(p.T315I) 14.34% ID=COSM12605;OCCURENCE=10(haematopoietic_and_lymphoid_tissue);c.749G>A(p.G250E) 16.06% ID=COSM12577;OCCURENCE=9(haematopoietic_and_lymphoid_tissue);c.1075T>G(p.F359V) 3.31% ID=COSM12560;OCCURENCE=56(haematopoieticand_lymphoid_tissue)	c.2185A>G(p.N729D) 14.51% ID=COSM1635198,COSM1635197;OCCURENCE=1(liver)	c.4754C>T(p.T1585M) 48.99%				c.2440C>T(p.R814C) 50.83% ID=COSM1716789;OCCURENCE=2(haematopoietic_and_lymphoid_tissue)			c.85G>A(p.A29T) 100.00% ID=COSM28715;OCCURENCE=3(kidney)																									c.2222A>C(p.D741A) 4.29%
B29	Dasatinib	TKIs-resistance	AP	Male	54	3	c.1075T>G(p.F359V) 10.18% ID=COSM12605;OCCURENCE=10(haematopoietic_and_lymphoid_tissue)				c.1879C>T(p.R627C) 50.27% ID=COSM1236142;OCCURENCE=1(haematopoietic_and_lymphoid_tissue)				c.2644C>T(p.R882C) 1.21% ID=COSM53042,COSM1166704;OCCURENCE=152(haematopoietic_and_lymphoid_tissue)						c.3128C>T(p.S1043L) 50.36%
B3	Imatinib	TKIs-resistance	CP	Female	59	5								c.1190A>G(p.Q397R) 49.46% ID=COSM26028;OCCURENCE=1(haematopoietic_and_lymphoid_tissue)	c.2303A>T(p.D768V) 23.13%					c.3348G>A(p.Q1116Q) 99.98%;c.923C>T(p.P308L) 51.03%							c.539A>T(p.Y180F) 47.52%											c.159T>C(p.S53S) 50.49%;c.376C>T(p.R126W) 49.46%
B30	Nilotinib	TKIs-resistance	CP	Male	18	2																					c.719A>G(p.Y240C) 47.61%						c.731C>T(p.T244I) 100.00% ID=COSM132904;OCCURENCE=1(stomach),1(haematopoietic_and_lymphoid_tissue)
B31	Dasatinib	TKIs-resistance	CP	Female	39	5	c.698A>G(p.D233G) 18.79%			c.1927dupG(p.G642fs) 15.93% ID=COSM1411076;OCCURENCE=1(large_intestine)	c.2602G>A(p.D868N) 11.74% ID=COSM1318400;OCCURENCE=48(haematopoietic_and_lymphoid_tissue)			c.497G>A(p.R166Q) 4.66% ID=COSM36055;OCCURENCE=3(haematopoietic_and_lymphoid_tissue)								c.8072T>G(p.V2691G) 49.74%								c.636G>A(p.W212X) 49.11% ID=COSM147000;OCCURENCE=1(stomach)
B42	Imatinib	TKIs-resistance	AP	Male	43	3	c.730A>G(p.M244V) 46.05% ID=COSM12608;OCCURENCE=4(haematopoietic_and_lymphoid_tissue);c.944C>T(p.T315I) 1.31% ID=COSM12560;OCCURENCE=56(haematopoietic_and_lymphoid_tissue)		c.11177T>A(p.I3726N) 49.57%					c.593A>G(p.D198G) 45.81% ID=COSM24799;OCCURENCE=1(breast),6(haematopoietic_and_lymphoid_tissue),1(large_intestine)											c.2457G>A(p.V819V) 50.18% ID=COSM13400;OCCURENCE=1(liver),1(lung),1(central_nervous_system)
B49	Dasatinib	TKIs-resistance	BC	Male	41	4							c.86C>G(p.P29R) Exon 3 99.97%					c.1151T>A(p.V384D) Exon 12 49.25% ID=COSM26085														c.692C>T(p.S231L) Exon 8 2.72% ID=COSM1130534
B5	Imatinib	TKIs-resistance	CP	Male	41	1		c.11374C>A(p.Q3792K) 50.60% ID=COSM1581231,COSM1581232;OCCURENCE=1(haematopoietic_and_lymphoid_tissue)
B50	Unknown	TKIs-resistance	BP	Female	46	3						c.742A>C(p.T248P) Exon3 7.50%
B51	Nilotinib	TKIs-resistance	BP	Female	61	3					c.2873A>G(p.E958G) Exon 4 48.90%					c.85G>A(p.A29T) Exon 2 52.74% ID=COSM28715 OCCURENCE=3(kidney)
B52	Unknown	TKIs-resistance	BP	Male	30	4		c.2170A>T(p.K724X) Exon 14 1.40%ID=COSM224952,COSM224951；c.2315C>T(p.S772L) Exon 14 47.19%					c.3116C>T(p.S1039L) Exon 3 50.95%										c.6787C>T(p.R2263W) Exon 34 15.79%
B53	Nilotinib	TKIs-resistance	CP	Male	49	6	c.944C>T(p.T315I) Exon 6 2.22%ID=COSM12560;OCCURENCE=56(haematopoietic_and_lymphoid_tissue)			c.1888_1910del(p.H630fs) Exon 12 2.09% ID=COSM51200;OCCURENCE=6(haematopoietic_and_lymphoid_tissue)		c.490G>A(p.A164T) Exon 3 99.82% ID=COSM445531;OCCURENCE=1(breast),1(large_intestine)	c.86C>G(p.P29R) Exon 3 100.00%	c.1005G>T(p.Q335H) Exon 9 50.96%																						c.3716G>A(p.R1239K) Exon 16 49.50%								c.178T>A(p.L60I) Exon 3 49.63%
B54	Dasatinib	TKIs-resistance	AP	Male	56	3		c.2170A>T(p.K724X) Exon 14 1.16% ID=COSM224952,COSM224951;OCCURENCE=1(kidney),1(skin)；c.2206T>C(p.L736L) Exon 14 4.18%；:c.2294A>G(p.E765G) Exon 14 8.33% ID=COSM227525,COSM227526;OCCURENCE=1(skin)		c.1888_1910del(p.H630fs) Exon 12 9.63% ID=COSM51200;OCCURENCE=6(haematopoietic_and_lymphoid_tissue)															c.2457G>A(p.V819V) Exon 20 49.20% ID=COSM13400;OCCURENCE=1(liver),1(lung),1(central_nervous_system)
B55	Nilotinib	TKIs-resistance	CP	Male	66	4				c.1927dupG(p.G642fs) Exon 12 23.84% ID=COSM1411076;OCCURENCE=1(large_intestine)；c.3671G>C(p.R1224T) Exon 12 49.54% ID=COSM1012891;OCCURENCE=1(haematopoietic_and_lymphoid_tissue)	c.2606G>A(p.S869N) Exon 4 4.22% ID=COSM1716871;OCCURENCE=1(haematopoietic_and_lymphoid_tissue)；						c.127G>A(p.A43T) Exon 2 100.00%
B59	Imatinib	TKIs-resistance	CP	Male	51	3		c.11374C>A(p.Q3792K) Exon 43 49.53% ID=COSM1581231,COSM1581232;OCCURENCE=1(haematopoietic_and_lymphoid_tissue)								c.85G>A(p.A29T) Exon 2 100.00% ID=COSM28715;OCCURENCE=3(kidney)	c.127G>A(p.A43T) Exon 2 51.87%
B6	Imatinib	TKIs-resistance	CP	Female	33	13		c.2294A>G(p.E765G) 5.17% ID=COSM227525,COSM227526;OCCURENCE=1(skin);c.2315C>T(p.S772L) 24.74%;c.2379G>A(p.S793S) Exon 14 31.85% ID=COSM452728,COSM452727;OCCURENCE=1(breast)；c.2418C>G(p.S806S) Exon 14 11.20% ID=COSM86082,COSM1496553;OCCURENCE=1(breast),1(kidney)；c. 2512G>A(p.G838S) Exon 14 50.29%	c.7106C>T(p.T2369M) 50.42%					c.1190A>G(p.Q397R) 46.79% ID=COSM26028;OCCURENCE=1(haematopoietic_and_lymphoid_tissue)		c.85G>A(p.A29T) 50.32% ID=COSM28715;OCCURENCE=3(kidney)				c.923C>T(p.P308L) 46.59%			c.5094C>T(p.D1698D) Exon 27 99.93% ID=COSM1461158,COSM33747;OCCURENCE=11(haematopoietic_and_lymphoid_tissue),1(lung),2(large_intestine)			c.5885C>T(p.P1962L) 99.11% ID=COSM149376,COSM149375;OCCURENCE=1(stomach);	c.539A>T(p.Y180F) 4786%									c.1458T>C(p.Y486Y) Exon 12 1.67% ID=COSM1432175; OCCURENCE=1(large_intestine)；c.1635G>A(p.A545A) Exon 14 49.75%；c.4479G>A(p.T1493T) Exon 16 49.40%；c.5034G>A(p.G1678G) Exon 16 49.52%；c.5268T>G(p.S1756S) Exon 16 48.58%；c.5465T>A(p.V1822D) 51.57%；c.5880G>A(p.P1960P) Exon 16 51.24%		c.376C>T(p.R126W) 49.64%	c.1701A>G(p.P567P) Exon 12 100.00% ID=COSM1430082;OCCURENCE=1(large_intestine)
B61	Dasatinib	TKIs-resistance	BP	Male	49	6	c.763G>A(p.E255K) Exon 4 32.73% ID=COSM12573;OCCURENCE=22(haematopoietic_and_lymphoid_tissue);c.944C>T(p.T315I) Exon 6 30.41% ID=COSM12560; OCCURENCE=56(haematopoietic_and_lymphoid_tissue)	c.2170A>T(p.K724X) Exon 14 1.92% ID=COSM224952,COSM224951;OCCURENCE=1(kidney),1(skin);c.2294A>G(p.E765G) Exon 14 8.62% ID=COSM227525,COSM227526;OCCURENCE=1(skin)	c.3874G>A(p.E1292K) Exon 5 49.53%				c.2604T>G(p.F868L) Exon 3 51.12% ID=COSM87107;OCCURENCE=7(haematopoietic_and_lymphoid_tissue)					c.649C>T(p.R217C) Exon 8 49.28% ID=COSM186809;OCCURENCE=1(large_intestine)		c.2240C>T(p.P747L) Exon 12 51.01%															c.878T>C(p.L293P) Exon 10 49.79%
B63	Imatinib	TKIs-resistance	CP	Male	41	3		c.2294A>G(p.E765G) Exon 14 5.59% ID=COSM227525,COSM227526;OCCURENCE=1(skin)											c.1638A>G(p.K546K) Exon 10 52.34% ID=COSM21983;OCCURENCE=2(bone),2(soft_tissue),5(large_intestine)
B64	Imatinib	TKIs-resistance	CP	Male	41	4		c.2170A>T(p.K724X) Exon 14 1.59% ID=COSM224952,COSM224951;OCCURENCE=1(kidney),1(skin);c.2294A>G(p.E765G) Exon 14 8.12% ID=COSM227525,COSM227526;OCCURENCE=1(skin)			c.1828G>A(p.V610I) Exon 4 50.58%													c.1286A>C(p.E429A) Exon 8 99.80%
B65	Dasatinib	TKIs-resistance	BP	Male	43	3	c.944C>T(p.T315I) exon6 49.26% ID=COSM12578;OCCURENCE=19(haematopoieticdlmphoidtissue)						c.652G>A(p.V218M) Exon3 53.99%	c.433A>G(p.A145G) Exon5 95.3%
B66	Dasatinib	TKIs-resistance	CP	Female	32	6	c.944C>T(p.T315I) Exon 6 45.57% ID=COSM12560;OCCURENCE=56(haematopoietic_and_lymphoid_tissue)	c.2315C>T(p.S772L) Exon 14 43.34%			c.1700C>T(p.S567F) Exon 4 49.61%							c.2101C>A(p.Q701K) Exon 18 49.87%													c.1621C>T(p.H541Y) Exon 8 48.76%				c.878T>C(p.L293P) Exon 10 99.92%
B7	Imatinib	TKIs-resistance	CP	Female	62	4	c.730A>G(p.M244V) 2.87% ID=COSM12608;OCCURENCE=4(haematopoietic_and_lymphoid_tissue)		c.13652C>G(p.A4551G) 47.97%														c.7541_7542del(p.P2514fs) 1.31% ID=COSM12774,COSM1292819;OCCURENCE=8(NS),187(haematopoietic_and_lymphoid_tissue)	c.1286A>C(p.E429A) 99.98%						c.583C>T(p.L195F) 48.74%
B8	Imatinib	TKIs-resistance	CP	Male	62	1		c.10639T>C(p.S3547P) 49.61%;c.2294A>G(p.E765G) 5.34% ID=COSM227525,COSM227526;OCCURENCE=1(skin);c.2459C>T(p.T820I) 2.56%
B9	Imatinib	TKIs-resistance	CP	Female	32	2					c.2873A>G(p.E958G) 48.14%						c.21A>G(p.T7T) 99.91% ID=COSM1600002,COSM438304,COSM438303;OCCURENCE=1(breast),1(large_intestine),1(central_nervous_system)
C2	Imatinib	TKIs-intolerance	CP	Female	54	2						c.490G>A(p.A164T) 99.92% ID=COSM445531;OCCURENCE=1(breast),1(large_intestine)
C27	Dasatinib	TKIs-intolerance	CP	Male	56	2	c.944C>T(p.T315I) 36.67% ID=COSM12560;OCCURENCE=56(haematopoietic_and_lymphoid_tissue)		c.3874G>A(p.E1292K) 49.09%											c.3751G>A(p.G1251R) 48.40%
C32	Dasatinib	TKIs-intolerance	CP	Female	49	2				c.3692C>T(p.S1231F) 48.71%											c.3813delA(p.P1271fs) 1.04% ID=COSM1446864;OCCURENCE=1(NS),1(large_intestine)
C32	Dasatinib	TKIs-intolerance	CP	Female	49	2				c.3692C>T(p.S1231F) Exon 12 50.59%													c.7244_7246del(p.2415_2416del) Exon 34 3.79% ID=COSM391289,COSM391288;OCCURENCE=1(lung)
C33	Nilotinib	TKIs-intolerance	CP	Female	65	4																			c.2361G>A(p.Q787Q) 100.00% ID=COSM1451600;OCCURENCE=1(breast),1(large_intestine)			c.64G>A(p.D22N) 46.88%				c.692C>T(p.S231L) 3.50% ID=COSM1130534,COSM1288794;OCCURENCE=1(autonomic_ganglia),2(prostate)							c.1809G>A(p.A603A) 99.94%;c.2472C>T(p.V824V) 99.94% ID=COSM22413;OCCURENCE=2(central_nervous_system),1(endometrium),11(soft_tissue)
C34	Dasatinib	TKIs-intolerance	CP	Female	48	3						c.522A>C(p.P174P) 14.30% ID=COSM244663;OCCURENCE=1(prostate)			c.1910T>A(p.L637Q) 1.69%						c.1298A>G(p.Q433R) 1.90%；c.3813delA(p.P1271fs) 1.08% ID=COSM1446864;OCCURENCE=1(NS),1(large_intestine)
C35	Dasatinib	TKIs-intolerance	CP	Male	33	6		c.11374C>A(p.Q3792K) 51.08% ID=COSM1581231,COSM1581232;OCCURENCE=1(haematopoietic_and_lymphoid_tissue)			c.2602G>A(p.D868N) 28.34% ID=COSM1318400;OCCURENCE=48(haematopoieticand_lymphoid_tissue)							c.1151T>A(p.V384D) 48.51% ID=COSM26085;OCCURENCE=3(pancreas)	c.1621A>C(p.M541L) 49.04% ID=COSM28026;OCCURENCE=11(bone),1(stomach),16(haematopoietic_and_lymphoid_tissue),2(softtissue),1(skin)
C36	Dasatinib	TKIs-intolerance	CP	Male	40	3						c.490G>A(p.A164T) 99.90% ID=COSM445531;OCCURENCE=1(breast),1(large_intestine)		c.1139A>G(p.Y380C) 49.41%																										c.797delC(p.P266fs) 1.10% ID=COSM28969;OCCURENCE=1(haematopoietic_and_lymphoid_tissue)
C36	Dasatinib	TKIs-intolerance	CP	Male	40	6	c.944C>T(p.T315I) Exon 6 22.83% ID=COSM12560;OCCURENCE=56(haematopoietic_and_lymphoid_tissue)	c.2294A>G(p.E765G) Exon 14 5.45% ID=COSM227525,COSM227526;OCCURENCE=1(skin) ;c.2315C>T(p.S772L) Exon 14 41.69%		c.1888_1910del(p.H630fs) Exon 12 19.19% ID=COSM51200;OCCURENCE=6(haematopoietic_and_lymphoid_tissue);		c.490G>A(p.A164T) Exon 3 99.95% ID=COSM445531;OCCURENCE=1(breast),1(large_intestine)		c.1139A>G(p.Y380C) Exon 9 50.63%
C37	Dasatinib	TKIs-intolerance	BP	Female	49	6			c.8465T>C(p.L2822P) 50.54%				c.3181C>A(p.P1061T) 48.80%									c.10384C>T(p.L3462F) 49.46% ID=COSM224409;OCCURENCE=1(skin)		c.700G>A(p.D234N) 50.74%																									c.6101G>A(p.R2034Q) 49.04%
C38	Dasatinib	TKIs-intolerance	CP	Male	48	1																												c.839G>A(p.R280H) 51.96% ID=COSM1394288;OCCURENCE=1(large_intestine)
C39	Dasatinib	TKIs-intolerance	AP	Male	31	8	c.944C>T(p.T315I) exon6 3.19% ID=COSM12578;OCCURENCE=19(haematopoieticdlmphoidtissue) ;c.944C>T(p.M351T) exon6 22.20% ID=COSM12577; OCCURENCE=9(haematopoietic_and_lymphoid_tissue);c.763G>A(p.E255K) exon4 2.84% ID=COSM12573;OCCURENCE=22(haematopoietic;c.749G>A(p.G250E) exon4 13.95% ID=COSM12560;OCCURENCE=56(haematopoieticand_lymphoid_tissue)			c.2077C>T(p.R693X) exon12 25.84% ID=COSM51388;OCCURENCE=11(haematopoietic_and_lymphoid_tissue),2(large_intestine); c.3692C>T(p.S1231F) 50.53%			c.5162T>G(p.L1721W) 50.56%				c.127G>A(p.A43T) 53.20%											c.1886A>G(p.D629G) 48.69%	c.553G>C(p.D185H) 99.49%				c.731C>T(p.T244I) 99.72% ID=COSM132904;OCCURENCE=1(stomach),1(haematopoietic_and_lymphoid_tissue)	c.839G>A(p.R280H) 58.08% ID=COSM1394288;OCCURENCE=1(large_intestine)									c.821G>A(p.R274Q) 45.73% ID=COSM306061;OCCURENCE=1(haematopoietic_and_lymphoid_tissue)
C4	Imatinib	TKIs-intolerance	CP	Male	53	5		c.2294A>G(p.E765G) 5.19% ID=COSM227525,COSM227526;OCCURENCE=1(skin);c.2418C>G(p.S806S) ID=COSM86082,COSM1496553;OCCURENCE=1(breast),1(kidney)				c.490G>A(p.A164T) 99.86% ID=COSM445531;OCCURENCE=1(breast),1(large_intestine)		c.1270T>C(p.S424P) 7.90%																							c.7151A>C(p.H2384P) 9.50%
C40	Nilotinib	TKIs-intolerance	CP	Male	54	1													c.2243T>C(p.I748T) exon16 50.27% ID=COSM19111;OCCURENCE=1(haematopoietic_and_lymphoid_tissue)
C41	Dasatinib	TKIs-intolerance	CP	Female	53	4						c.490G>A(p.A164T) 99.96% ID=COSM445531;OCCURENCE=1(breast),1(large_intestine)					c.21A>G(p.T7T) 100.00% ID=COSM1600002,COSM438304,COSM438303;OCCURENCE=1(breast),1(large_intestine),1(central_nervous_system)					c.7879C>T(p.R2627C) 50.03%
C43	Dasatinib	TKIs-intolerance	AP	Female	48	3								c.395_396del(p.V132fs) 46.01% ID=COSM36065;OCCURENCE=1(haematopoietic_and_lymphoid_tissue)							c.3128C>T(p.S1043L) 6.53%；c.1104G>A(p.P368P) Exon 13 93.11% ID=COSM1568186,COSM1568187;OCCURENCE=1(large_intestine)
C44	Dasatinib	TKIs-intolerance	CP	Male	60	4	c.944C>T(p.T315I) 46.61% ID=COSM12560;OCCURENCE=56(haematopoieticand_lymphoid_tissue)			c.1888_1910del(p.H630fs) 36.44% ID=COSM51200;OCCURENCE=6(haematopoietic_and_lymphoid_tissue)		c.490G>A(p.A164T) 99.90% ID=COSM445531;OCCURENCE=1(breast),1(large_intestine)												c.1286A>C(p.E429A) 100.00%																							c.102G>C(p.E34D) 51.57%
C45	Dasatinib	TKIs-intolerance	BP	Female	40	1													c.1621A>C(p.M541L) 50.10% ID=COSM28026;OCCURENCE=11(bone),1(stomach),16(haematopoietic_and_lymphoid_tissue),2(soft_tissue),1(skin)
C46	Dasatinib	TKIs-intolerance	CP	Female	53	8		c.2294A>G(p.E765G) 8.76% ID=COSM227525,COSM227526;OCCURENCE=1(skin)	c.6440A>G(p.N2147S) 51.89%		c.2602G>A(p.D868N) 3.65% ID=COSM1318400;OCCURENCE=48(haematopoietic_and_lymphoid_tissue);c.2608G>A(p.G870S) 1.27% ID=COSM1234973;OCCURENCE=29(haematopoieticand_lymphoid_tissue);c.2618C>A(p.T873K) 13.03%	c.490G>A(p.A164T) 100.00% ID=COSM445531;OCCURENCE=1(breast),1(large_intestine)							c.1621A>C(p.M541L) 99.89% ID=COSM28026;OCCURENCE=11(bone),1(stomach),16(haematopoietic_and_lymphoid_tissue),2(softtissue),1(skin);c.2586G>C(p.L862L) 99.85% ID=COSM1325;OCCURENCE=2(bone),1(stomach),3(haematopoietic_and_lymphoid_tissue),2(large_intestine)	c.1519A>G(p.S507G) 48.93% ID=COSM88777;OCCURENCE=2(haematopoietic_and_lymphoid_tissue);	c.3813delA(p.P1271fs) 1.37% ID=COSM1446864;OCCURENCE=1(NS),1(large_intestine)					c.569C>T(p.P190L) 49.29%
C47	Unknown	TKIs-intolerance	AP	Male	48	5				c.1773C>A(p.Y591X) 32.68% ID=COSM1681609;OCCURENCE=1(haematopoietic_and_lymphoid_tissue)	c.2602G>C(p.D868H) 31.49%							c.649C>T(p.R217C) 47.38% ID=COSM186809;OCCURENCE=1(large_intestine)								c.578C>T(p.P193L) 51.97%
C56	Unknown	TKIs-intolerance	CP	Female	40	4																	c.6295G>A(p.D2099N) Exon 34 51.33%				c.719A>G(p.Y240C) Exon 9 50.74%										c.7151A>C(p.H2384P) Exon 31 14.87%
C58	Nilotinib	TKIs-intolerance	CP	Male	64	4	c.949T>C(p.F317L) Exon 6 11.45% ID=COSM49074;OCCURENCE=1(haematopoietic_and_lymphoid_tissue)	c.2418C>G(p.S806S) Exon 14 33.89% ID=COSM86082,COSM1496553;OCCURENCE=1(breast),1(kidney)；c.2459C>T(p.T820I) Exon 14 2.62%	c.4475C>G(p.T1492S) Exon 8 50.02%						c.958C>T(p.R320X) Exon 8 14.04% ID=COSM1318922,COSM133724,COSM133721;OCCURENCE=3(haematopoietic_and_lymphoid_tissue)																														c.2197C>A(p.P733T) Exon 17 51.35%
C60	Nilotinib	TKIs-intolerance	CP	Male	53	0	c.895G>C(p.V299L) Exon 5 3.25%;c.951C>A(p.F317L) Exon 6 40.76% ID=COSM131573;OCCURENCE=1(haematopoietic_and_lymphoid_tissue)
[truncated: 23 more columns]
